# Supplementary material
Source: PubMed Central journal article supplement (PMC7362958)
Supplement: NIHMS1597460-supplement-Supplementary_Appendix.pdf [file NIHMS1597460-supplement-Supplementary_Appendix.pdf]

## Supplementary Appendix

This appendix has been provided by the authors to give readers additional information about their work.

### Table of Contents

|                                    |              |
|------------------------------------|--------------|
| Participating Institutions         | Page 2       |
| Other Significant Contributors     | Page 2       |
| Methods                            | Page 2 – 5   |
| Supplementary Results Tables       | Page 6       |
| Supplementary Colonization Results | Page 7       |
| Supplementary Safety Results       | Page 7       |
| Supplementary Safety Tables        | Pages 8 - 16 |

## **Participating Centers**

University of California San Francisco (UCSF) - Ruby Warnock, Tiffany Han, Jessica Holzman, Gabrielle Westergren, Andrea Raider, Misa Perron-Burdick

University of California San Diego (UCSD) – Kathy Nuffer, Leah Burke

Cook County Health- The Ruth M Rothstein CORE Center – Kerianne Burke, MPH

Washington University (WU) – Mike Klebert

## **Other Significant Contributors**

National Institute of Allergy and Infectious Diseases/Division of Microbiology and Infectious Disease: Jonathan Glock, Lori Newman, Carmelle Norice-Tra, Carolyn Deal Soju Chang, Lei Huang, Bin Hoang, Tammy Yokum, Jill Long, Peter Wolff

The Emmes Company: Sara Jolles, Hannah Kwak, Amy Tan

Labs: Charles Chiu (UCSF), Sharon Hillier (Magee Womens Healthcare Institute), Victoria Gould (Magee Womens Healthcare Institute), Nicolas Laroque (UCSF), Angela Marcobal (Osel, Inc.)

Social & Scientific Systems: Gwendolyn Maddox, Jillian Van Zee, Nasreen Jaheed, Sean McCarthy, Sara McCurdy

STAR Sexually Transmitted Infection-Clinical Trial Group: Jeff Klausner (UCLA)

We received approval from the institutional review boards of the four collaborating institutions prior to study initiation.

NIAID/DMID had no direct role in designing the study; collecting, handling, analyzing, or interpreting data; writing the manuscript; and the decision to publish this manuscript.

## **Methods**

### **Participants met the following inclusion and exclusion criteria:**

1. Capable of reading and writing in English and voluntarily provide written informed consent to participate in the study and comply with all study procedures.
2. Untreated BV (asymptomatic or symptomatic) as diagnosed during the screening visit defined by  $\geq 3$  Amsel criteria.
3. Untreated BV (asymptomatic or symptomatic) as confirmed in the laboratory using the Nugent scoring system (Nugent score  $\geq 4$ )
4. Otherwise healthy pre-menopausal women 18–45 years of age on the day of screening.
5. Regular predictable menstrual cycles or amenorrheic for at least 3 months due to use of a long-acting progestin or continuous use of oral contraceptives.

6. Willing to be asked questions about personal medical health and sexual history.
7. Willing to apply study agent vaginally and comply with study examinations.
8. Agree to abstain from sexual intercourse during the first 5 consecutive days of study product administration, 12 hours prior to study visits and for 12 hours after each study product application.
9. Agree to abstain from the use of any other intravaginal product throughout the trial period from the time of screening through Visit 7 (Week 24, Day 168). (Note: Intravaginal products include contraceptive creams such as Gynol II, gels, foams, sponges, lubricants not approved by the study investigators, and douches. Limit use of tampons during menstruation to unscented products.)
10. Must be of non-childbearing potential or if of childbearing potential, must agree to use a reliable method of birth control for the duration of the study. (Note: Reliable methods of birth control include tubal ligation, male partner with a vasectomy, a steroidal contraceptive (oral, patch, injectable or implantable), IUD, condoms or abstinence.

Participants meeting any of the following criteria at screening, or when assessed at the enrollment visit, were excluded from study enrollment.

1. Urogenital infection at screening. (Note: Urogenital infection includes urinary tract infection, *Trichomonas (T.) vaginalis*, *Neisseria (N.) gonorrhoeae*, *Chlamydia (C.) trachomatis*, *Treponema (T.) pallidum*, or vulvo-vaginal candidiasis.)
2. Diagnosis of two or more outbreaks of *N. gonorrhoeae*, *C. trachomatis*, *T. pallidum*, *T. vaginalis*, or herpes simplex virus (herpes genitalis) within 6 months prior to screening.
3. Positive for syphilis or HIV at screening.
4. Current pregnancy or within 2 months of last pregnancy and/or currently breastfeeding.
5. Vaginal or systemic antibiotic or antifungal therapy (other than MetroGel given as part of study procedures) within 21 days of screening or within 30 days of enrollment.
6. Use of disulfiram within past 2 weeks or other contraindication to use of MetroGel.
7. Any condition requiring regular periodic use of systemic antibiotics during participation in the trial.
8. Active genital herpes lesion (if not resolved by enrollment).
9. Investigational drug use other than LACTIN-V within 30 days or 10 half-lives of the drug, whichever is longer, of enrollment visit.
10. Other planned participation in an investigational drug study while participating in this study.
11. Menopause defined as more than 12 consecutive months of amenorrhea without another known cause including pregnancy.
12. IUD insertion or removal, pelvic surgery, cervical cryotherapy or cervical laser treatment within the last 2 months prior to screening.
13. Use of vaginal ring (e.g., NuvaRing) within 3 days of screening or during the course of the study.
14. Failure to complete 5 days of MetroGel with the last dose taken no later than 48 hours prior to randomization.
15. Use of new long-acting hormonal treatments. Participant may be enrolled if stable (>3 months) on existing therapy as determined by the principal investigator.
16. Known allergy to any component of LACTIN-V/placebo or MetroGel or to nitroimidazole derivatives or latex (condoms).
17. Any social, medical, or psychiatric condition, including history of drug or alcohol abuse,

that in the opinion of the investigator would make it unlikely for the participant to comply with the study. Treatments

**Treatment Adherence:** All participants received a total of 25 doses of study product. Adherence was assessed by participant's self-report and by staining of the returned applicators, organized in pre-labelled pouches provided for each week. Treatment adherence was part of the review of the blinded case review committee. Treatment adherence was defined as having taken at least four of five doses during week one and 75% of total doses required per protocol, which allowed skipping or delaying a dose during menstruation or BV retreatment during weeks 2-11.

#### **Lactobacillus PCR protocol:**

200µL of sample volume was extracted using EZ1 DNA Tissue kit (Qiagen) and eluted into 50µL volume. PCR reactions were setup in duplicate with 25µL QuantiTect SYBR Green RT-PCR Master Mix (Qiagen), 2.5µL forward primer (10µM), 2.5 µL reverse primer (10µM), 10µL extract and 10µL H<sub>2</sub>O for a total volume of 50µL. Following initial denaturation at 95°C for 15 minutes, PCR cycling consisted of 40 cycles at 95°C for 30 seconds, 58°C for 60 seconds, and 72°C for 60 seconds. Gene targets for strain and species-specific PCR were selected using genes identified in *Lactobacillus crispatus* CTV-05 and *L. crispatus*-specific regions which were absent in other sequenced bacterial strains and with low numbers of homologs in vaginal metagenome datasets. Primer sequences consisted of forward and reverse primers targeting *L. crispatus* CTV-05 strain (LBKG\_01471, GCTGTTGCAGCCAGACAGTT, TCTCTGGGACATCCATAAGTTG, 206bp), *L. crispatus* (LBKG\_00854, AAAGTCCTGTTTTGATCTGCGT, CACTTCCTAGCCACTGTGTTGT, 101bp), *Lactobacillus* species (16S ribosomal DNA, AGAGTTTGATYMTGGCTCAG, CACCGCTACACATGGAG, 667bp) and total bacteria (16S ribosomal DNA, AGAGTTTGATCCTGGCTCAG, GCTGCCTCCCGTAGGAGT, 312bp). (1-5) Bacterial concentration was calculated from mean sample Ct values using a standard curve based on serial dilutions of CTV-05 strain of *L. crispatus*. Limits of detection determined for each target at the 95% detection threshold were  $6.60 \times 10^2$  CFU/mL (CTV-05 strain),  $9.53 \times 10^2$  CFU/mL (*L. crispatus*) and  $1.01 \times 10^2$  CFU/mL (*Lactobacillus* species). Detection of *L. crispatus* CTV-05 by qPCR assay was defined as *L. crispatus* species and *L. crispatus* CTV-05 strain both above the lower limit of detection as defined above.

#### **References:**

1. Heilig GHJ, Zoetendal EG, Vaughan EE, Marteau P, Akkermans ADL, de Vos WM. Molecular Diversity of *Lactobacillus* spp. and Other Lactic Acid Bacteria in the Human Intestine as Determined by Specific Amplification of 16S Ribosomal DNA. *Appl Environ Microbiol* 2002;68:114-123.
2. Kibe R, Sakamoto M, Yokota H, Ishikawa H, Aiba Y, Koga Y, Benno Y. Movement and Fixation of Intestinal Microbiota after Administration of Human Feces to Germfree Mice. *Appl Environ Microbiol* 2005;71:3171-3178.
3. Ling Z, Liu X, Chen X, Zhu H, Nelson KE, Xia Y, Li L, Xiang C. Diversity of Cervicovaginal Microbiota Associated with Female Lower Genital Tract Infections. *Microb Ecol* 2011;61:704-714.

#### **Case Review Committee**

Prior to unblinding, a case review committee was convened (Supplementary Appendix Methods). to review participants with any reported concomitant medications (e.g. antibiotics) or out of window visits, poor adherence to study product, and all reported protocol deviations, to

determine if any of the cases or events could potentially impact study product effectiveness or study analyses. Afterwards, the study biostatistician used the review to determine participant allocation to the modified intention-to-treat, complete case, and per-protocol analyses. All enrolled participants were included in the intention-to-treat analysis.

### **Statistical Methods: Definition of Analyses Cohorts**

The modified-(m)ITT analyses excluded participants with baseline concomitant vaginal/cervical infections, who did not receive study product, or who did not return for at least one post-baseline visit. The complete case analyses further excluded participants who were not followed up until either the first BV diagnosis or the Week 12 visit. The per-protocol analyses further restricted the complete case analyses to exclude those who did not meet all enrollment eligibility criteria, were not compliant with the study product dosing regimen, or who used prohibited medications prior to either their first BV diagnosis or the Week 12 visit. Week 24 analyses were defined similarly. To be considered compliant with the dosing regimen, a participant must have used at least four of the first five daily doses and at least 75% of doses overall.

## Supplementary Results Tables

**Table S1: BV Recurrence by Week 12 by Analysis Population and Treatment Group**

| Study Arm                                    | Proportion with BV | RR (95% CI)       |
|----------------------------------------------|--------------------|-------------------|
| <b>Intention-to-Treat (LOCF)</b>             |                    |                   |
| LACTIN-V (n=152)                             | 46 (30%)           | 0.68 (0.48, 0.96) |
| Placebo (n=76)                               | 34 (45%)           | -                 |
| <b>Modified-Intention-to-Treat (LOCF)</b>    |                    |                   |
| LACTIN-V (n=140)                             | 46 (33%)           | 0.65 (0.46, 0.90) |
| Placebo (n=67)                               | 34 (51%)           | -                 |
| <b>Complete Case</b>                         |                    |                   |
| LACTIN-V (n=132)                             | 46 (35%)           | 0.66 (0.47, 0.91) |
| Placebo (n=64)                               | 34 (53%)           | -                 |
| <b>Per-Protocol (self-report)</b>            |                    |                   |
| LACTIN-V (n=118)                             | 36 (31%)           | 0.57 (0.40, 0.82) |
| Placebo (n=58)                               | 31 (53%)           | -                 |
| <b>Per-Protocol (by applicator staining)</b> |                    |                   |
| LACTIN-V (n=112)                             | 35 (31%)           | 0.60 (0.41, 0.88) |
| Placebo (n=54)                               | 28 (52%)           |                   |

**Table S2: BV Recurrence by Week 24 by Analysis Population and Treatment Group**

| Study Arm                                    | Proportion with BV | RR (95% CI)       |
|----------------------------------------------|--------------------|-------------------|
| <b>Intention-to-Treat (LOCF)</b>             |                    |                   |
| LACTIN-V (n=140)                             | 59 (39%)           | 0.72 (0.54, 0.96) |
| Placebo (n=67)                               | 41 (54%)           | -                 |
| <b>Modified-Intention-to-Treat (LOCF)</b>    |                    |                   |
| LACTIN-V (n=140)                             | 59 (42%)           | 0.69 (0.52, 0.90) |
| Placebo (n=67)                               | 41 (61%)           | -                 |
| <b>Complete Case</b>                         |                    |                   |
| LACTIN-V (n=132)                             | 59 (48%)           | 0.73 (0.57, 0.94) |
| Placebo (n=64)                               | 41 (66%)           | -                 |
| <b>Per-Protocol (self-report)</b>            |                    |                   |
| LACTIN-V (n=118)                             | 48 (45%)           | 0.71 (0.53, 0.95) |
| Placebo (n=58)                               | 35 (64%)           | -                 |
| <b>Per-Protocol (by applicator staining)</b> |                    |                   |
| LACTIN-V (n=112)                             | 45 (45%)           | 0.71 (0.52, 0.96) |
| Placebo (n=54)                               | 32 (63%)           |                   |

## Additional Detection of *L. crispatus* CTV-05 Results

**Table S3: Detection of *Lactobacillus crispatus* CTV-05 among participants randomized to the LACTIN-V arm compared by product compliance, menses and condomless sex at 12-week and 24-week visits**

| Variable                                             | Detection of <i>L. crispatus</i> CTV-05 | RR (95% CI)       |
|------------------------------------------------------|-----------------------------------------|-------------------|
| <b>Product compliance at 12-weeks</b>                |                                         |                   |
| ≥75% of doses (n=116)                                | 91 (78%)                                | 1.07 (0.78, 1.47) |
| <75% of doses (n=15)                                 | 11 (73%)                                | -                 |
| <b>Product compliance at 24-weeks</b>                |                                         |                   |
| ≥75% of doses (n=108)                                | 52 (48%)                                | 1.04 (0.56, 1.94) |
| <75% of doses (n=13)                                 | 6 (46%)                                 | -                 |
| <b>Effect of menses since last visit at 12-weeks</b> |                                         |                   |
| History of menses (n=98)                             | 74 (76%)                                | 0.89 (0.74,1.07)  |
| No history of menses (n=33)                          | 28 (85%)                                | -                 |
| <b>Effect of menses since last visit at 24-weeks</b> |                                         |                   |
| History of menses (n=98)                             | 45 (46%)                                | 0.81 (0.53, 1.23) |
| No history of menses (n=23)                          | 13 (57%)                                | -                 |
| <b>History of condomless sex at 12-weeks</b>         |                                         |                   |
| Condomless sex (n = 49)                              | 38 (78%)                                | 0.99 (0.82, 1.20) |
| Abstinence or sex with condom (n = 82)               | 64 (78%)                                |                   |
| <b>History of condomless sex at 24-weeks</b>         |                                         |                   |
| Condomless sex (n = 44)                              | 19 (43%)                                | 0.85 (0.57, 1.28) |
| Abstinence of sex with condom (n = 77)               | 39 (51%)                                |                   |

### Additional Safety Results (see Table S8 for additional details)

None of the participants with a severe grade 3 AE or the participant with a serious AE (multiple lower limb fractures after a hiking accident) were classified as related to study product.

In the LACTIN-V group three participants experienced a severe unrelated AE, one subject reported upper limb fracture, and two became pregnant and reported spontaneous abortions. Study treatment was withdrawn for the two participants who experienced spontaneous abortions.

One SAE was reported for a participant in the LACTIN-V arm, multiple lower limb fractures after a fall during a hike on Study Day 155, requiring prolonged hospitalization for surgical correction. The SAE was considered resolved after 7 days and not related to study treatment.

In the placebo group three subjects experienced severe unrelated AEs: one subject was diagnosed with type 2 diabetes mellitus, one subject underwent an ovarian cystectomy, and one subject was diagnosed with severe hypertension.

## Additional Safety Tables

**Table S4: Number and Percentage of Subjects Experiencing Solicited Local Events by Symptom, Maximum Severity, and Treatment Group - Safety Population**

| Solicited Adverse Event                  | Severity <sup>a</sup> | LACTIN-V<br>(N=141) |    |            | Placebo<br>(N=66) |    |            |
|------------------------------------------|-----------------------|---------------------|----|------------|-------------------|----|------------|
|                                          |                       | n                   | %  | 95% CI     | n                 | %  | 95% CI     |
| Any Solicited Local Event <sup>b</sup>   | None                  | 17                  | 12 | 7.4, 18.6  | 7                 | 11 | 4.8, 20.1  |
|                                          | Mild                  | 58                  | 41 | 33.2, 49.6 | 23                | 35 | 23.9, 46.9 |
|                                          | Moderate              | 66                  | 47 | 38.6, 55.4 | 36                | 55 | 42.3, 66.4 |
|                                          | Severe                | 0                   | 0  | 0.0, 2.5   | 0                 | 0  | 0.0, 5.4   |
| Vaginal bleeding other than menstruation | None                  | 103                 | 73 | 65.0, 80.0 | 44                | 67 | 54.6, 77.7 |
|                                          | Mild                  | 33                  | 23 | 16.8, 31.1 | 19                | 29 | 18.5, 40.8 |
|                                          | Moderate              | 5                   | 4  | 1.4, 7.9   | 3                 | 5  | 1.3, 12.4  |
|                                          | Severe                | 0                   | 0  | 0.0, 2.5   | 0                 | 0  | 0.0, 5.4   |
| Abnormal vaginal discharge               | None                  | 46                  | 33 | 25.0, 40.7 | 20                | 30 | 20.1, 42.3 |
|                                          | Mild                  | 59                  | 42 | 33.8, 50.4 | 23                | 35 | 23.9, 46.9 |
|                                          | Moderate              | 36                  | 26 | 18.6, 33.2 | 23                | 35 | 23.9, 46.9 |
|                                          | Severe                | 0                   | 0  | 0.0, 2.5   | 0                 | 0  | 0.0, 5.4   |
| Abnormal vaginal odor                    | None                  | 61                  | 43 | 35.0, 51.8 | 32                | 48 | 36.2, 60.7 |
|                                          | Mild                  | 50                  | 35 | 27.9, 43.9 | 14                | 21 | 12.4, 32.4 |
|                                          | Moderate              | 30                  | 21 | 15.0, 28.9 | 20                | 30 | 20.1, 42.3 |
|                                          | Severe                | 0                   | 0  | 0.0, 2.5   | 0                 | 0  | 0.0, 5.4   |
| Genital itching                          | None                  | 54                  | 38 | 30.4, 46.8 | 32                | 48 | 36.2, 60.7 |
|                                          | Mild                  | 42                  | 30 | 22.5, 37.9 | 19                | 29 | 18.5, 40.8 |
|                                          | Moderate              | 45                  | 32 | 24.6, 40.0 | 15                | 23 | 14.0, 34.6 |
|                                          | Severe                | 0                   | 0  | 0.0, 2.5   | 0                 | 0  | 0.0, 5.4   |
| Genital burning                          | None                  | 93                  | 66 | 57.7, 73.6 | 47                | 71 | 59.2, 81.5 |
|                                          | Mild                  | 26                  | 18 | 12.5, 25.7 | 7                 | 11 | 4.8, 20.1  |
|                                          | Moderate              | 22                  | 16 | 10.3, 22.5 | 12                | 18 | 10.1, 29.3 |
|                                          | Severe                | 0                   | 0  | 0.0, 2.5   | 0                 | 0  | 0.0, 5.4   |
| External genital irritation              | None                  | 79                  | 56 | 47.5, 64.3 | 46                | 70 | 57.7, 79.9 |
|                                          | Mild                  | 34                  | 24 | 17.5, 31.8 | 12                | 18 | 10.1, 29.3 |
|                                          | Moderate              | 28                  | 20 | 13.9, 27.2 | 8                 | 12 | 5.4, 22.3  |
|                                          | Severe                | 0                   | 0  | 0.0, 2.5   | 0                 | 0  | 0.0, 5.4   |
| External genital swelling                | None                  | 111                 | 79 | 71.1, 85.0 | 56                | 85 | 74.5, 92.2 |
|                                          | Mild                  | 15                  | 11 | 6.1, 16.8  | 5                 | 8  | 3.0, 16.2  |
|                                          | Moderate              | 15                  | 11 | 6.1, 16.8  | 5                 | 8  | 3.0, 16.2  |
|                                          | Severe                | 0                   | 0  | 0.0, 2.5   | 0                 | 0  | 0.0, 5.4   |



|                                |                             | <b>LACTIN-V<br/>(N=141)</b> |          |               | <b>Placebo<br/>(N=66)</b> |          |               |
|--------------------------------|-----------------------------|-----------------------------|----------|---------------|---------------------------|----------|---------------|
| <b>Solicited Adverse Event</b> | <b>Severity<sup>a</sup></b> | <b>n</b>                    | <b>%</b> | <b>95% CI</b> | <b>n</b>                  | <b>%</b> | <b>95% CI</b> |
| Genital rash                   | None                        | 120                         | 85       | 78.2, 90.3    | 59                        | 89       | 79.9, 95.2    |
|                                | Mild                        | 13                          | 9        | 5.0, 15.0     | 4                         | 6        | 2.1, 14.7     |
|                                | Moderate                    | 8                           | 6        | 2.5, 10.7     | 3                         | 5        | 1.3, 12.4     |
|                                | Severe                      | 0                           | 0        | 0.0, 2.5      | 0                         | 0        | 0.0, 5.4      |

Notes: Denominator for percentages is the number of subjects in the Safety Population (N) with solicited adverse event data available after the first dose of study product.

<sup>a</sup>Each subject's maximum severity is reported for each solicited adverse event across all doses.

<sup>b</sup>Subjects are classified by their worst severity across all AEs

95% CI=95% Blaker Confidence Interval.

**Table S5: Number and Percentage of Subjects Experiencing Solicited Events with 95% Confidence Intervals by Symptom and Treatment Group - Safety Population**

|                                   |                             | LACTIN-V<br>(N=141) |    |            | Placebo<br>(N=66) |    |            |
|-----------------------------------|-----------------------------|---------------------|----|------------|-------------------|----|------------|
| Category                          | Solicited Adverse Event     | n                   | %  | 95% CI     | n                 | %  | 95% CI     |
| Solicited Adverse Events          | Any Solicited Adverse Event | 130                 | 92 | 86.7, 95.9 | 60                | 91 | 81.5, 96.0 |
| Solicited Local Adverse Events    | Any Local Adverse Event     | 124                 | 88 | 81.4, 92.6 | 59                | 89 | 79.9, 95.2 |
|                                   | Vaginal bleeding            | 38                  | 27 | 20.0, 35.0 | 22                | 33 | 22.3, 45.4 |
|                                   | Abnormal vaginal discharge  | 95                  | 67 | 59.3, 75.0 | 46                | 70 | 57.7, 79.9 |
|                                   | Abnormal vaginal odor       | 80                  | 57 | 48.2, 65.0 | 34                | 52 | 39.3, 63.8 |
|                                   | Genital itching             | 87                  | 62 | 53.2, 69.6 | 34                | 52 | 39.3, 63.8 |
|                                   | Genital burning             | 48                  | 34 | 26.4, 42.3 | 19                | 29 | 18.5, 40.8 |
|                                   | External genital irritation | 62                  | 44 | 35.7, 52.5 | 20                | 30 | 20.1, 42.3 |
|                                   | External genital swelling   | 30                  | 21 | 15.0, 28.9 | 10                | 15 | 7.8, 25.5  |
|                                   | Genital rash                | 21                  | 15 | 9.7, 21.8  | 7                 | 11 | 4.8, 20.1  |
| Solicited Systemic Adverse Events | Any Systemic Adverse Event  | 87                  | 62 | 53.2, 69.6 | 38                | 58 | 45.4, 69.2 |
|                                   | Nausea                      | 26                  | 18 | 12.5, 25.7 | 8                 | 12 | 5.4, 22.3  |
|                                   | Vomiting                    | 15                  | 11 | 6.1, 16.8  | 7                 | 11 | 4.8, 20.1  |
|                                   | Abdominal pain/cramps       | 59                  | 42 | 33.8, 50.4 | 27                | 41 | 29.3, 53.1 |
|                                   | Diarrhea                    | 31                  | 22 | 15.8, 29.7 | 12                | 18 | 10.1, 29.3 |
|                                   | Constipation                | 34                  | 24 | 17.5, 31.8 | 6                 | 9  | 4.0, 18.5  |
|                                   | Pain/burning with urination | 29                  | 21 | 14.3, 27.9 | 8                 | 12 | 5.4, 22.3  |
|                                   | Frequent urination          | 36                  | 26 | 18.6, 33.2 | 13                | 20 | 11.5, 30.8 |
|                                   | Blood in urine              | 6                   | 4  | 1.9, 9.0   | 0                 | 0  | 0.0, 5.4   |
|                                   | Headache                    | 48                  | 34 | 26.4, 42.3 | 16                | 24 | 14.7, 36.2 |

**Table S6: Number and Percentage of Subjects Experiencing Solicited Systemic Events by Symptom, Maximum Severity, and Treatment Group - Safety Population**

| Solicited Adverse Event      | Severity <sup>a</sup> | LACTIN-V<br>(N=141) |    |            | Placebo<br>(N=66) |    |            |
|------------------------------|-----------------------|---------------------|----|------------|-------------------|----|------------|
|                              |                       | n                   | %  | 95% CI     | n                 | %  | 95% CI     |
| Any Solicited Systemic Event | None                  | 54                  | 38 | 30.4, 46.8 | 28                | 42 | 30.8, 54.6 |
|                              | Mild                  | 41                  | 29 | 21.8, 37.2 | 17                | 26 | 16.2, 37.7 |
|                              | Moderate              | 46                  | 33 | 25.0, 40.7 | 21                | 32 | 21.4, 43.9 |
|                              | Severe                | 0                   | 0  | 0.0, 2.5   | 0                 | 0  | 0.0, 5.4   |
| Nausea                       | None                  | 115                 | 82 | 74.3, 87.5 | 58                | 88 | 77.7, 94.6 |
|                              | Mild                  | 17                  | 12 | 7.4, 18.6  | 5                 | 8  | 3.0, 16.2  |
|                              | Moderate              | 9                   | 6  | 3.2, 11.5  | 3                 | 5  | 1.3, 12.4  |
|                              | Severe                | 0                   | 0  | 0.0, 2.5   | 0                 | 0  | 0.0, 5.4   |
| Vomiting                     | None                  | 126                 | 89 | 83.2, 93.9 | 59                | 89 | 79.9, 95.2 |
|                              | Mild                  | 12                  | 9  | 4.7, 14.3  | 4                 | 6  | 2.1, 14.7  |
|                              | Moderate              | 3                   | 2  | 0.6, 6.1   | 3                 | 5  | 1.3, 12.4  |
|                              | Severe                | 0                   | 0  | 0.0, 2.5   | 0                 | 0  | 0.0, 5.4   |
| Abdominal pain/cramps        | None                  | 82                  | 58 | 49.6, 66.2 | 39                | 59 | 46.9, 70.7 |
|                              | Mild                  | 34                  | 24 | 17.5, 31.8 | 13                | 20 | 11.5, 30.8 |
|                              | Moderate              | 25                  | 18 | 12.0, 25.0 | 14                | 21 | 12.4, 32.4 |
|                              | Severe                | 0                   | 0  | 0.0, 2.5   | 0                 | 0  | 0.0, 5.4   |
| Diarrhea                     | None                  | 110                 | 78 | 70.3, 84.2 | 54                | 82 | 70.7, 89.9 |
|                              | Mild                  | 18                  | 13 | 7.9, 19.3  | 8                 | 12 | 5.4, 22.3  |
|                              | Moderate              | 13                  | 9  | 5.0, 15.0  | 4                 | 6  | 2.1, 14.7  |
|                              | Severe                | 0                   | 0  | 0.0, 2.5   | 0                 | 0  | 0.0, 5.4   |
| Constipation                 | None                  | 107                 | 76 | 68.2, 82.5 | 60                | 91 | 81.5, 96.0 |
|                              | Mild                  | 22                  | 16 | 10.3, 22.5 | 4                 | 6  | 2.1, 14.7  |
|                              | Moderate              | 12                  | 9  | 4.7, 14.3  | 2                 | 3  | 0.5, 10.1  |
|                              | Severe                | 0                   | 0  | 0.0, 2.5   | 0                 | 0  | 0.0, 5.4   |
| Pain/burning with urination  | None                  | 112                 | 79 | 72.1, 85.7 | 58                | 88 | 77.7, 94.6 |
|                              | Mild                  | 17                  | 12 | 7.4, 18.6  | 3                 | 5  | 1.3, 12.4  |
|                              | Moderate              | 12                  | 9  | 4.7, 14.3  | 5                 | 8  | 3.0, 16.2  |
|                              | Severe                | 0                   | 0  | 0.0, 2.5   | 0                 | 0  | 0.0, 5.4   |
| Frequent urination           | None                  | 105                 | 74 | 66.8, 81.4 | 53                | 80 | 69.2, 88.5 |
|                              | Mild                  | 24                  | 17 | 11.5, 24.0 | 5                 | 8  | 3.0, 16.2  |
|                              | Moderate              | 12                  | 9  | 4.7, 14.3  | 8                 | 12 | 5.4, 22.3  |
|                              | Severe                | 0                   | 0  | 0.0, 2.5   | 0                 | 0  | 0.0, 5.4   |

|                         |                       | LACTIN-V<br>(N=141) |    |            | Placebo<br>(N=66) |     |             |
|-------------------------|-----------------------|---------------------|----|------------|-------------------|-----|-------------|
| Solicited Adverse Event | Severity <sup>a</sup> | n                   | %  | 95% CI     | n                 | %   | 95% CI      |
| Blood in urine          | None                  | 135                 | 96 | 91.0, 98.1 | 66                | 100 | 94.6, 100.0 |
|                         | Mild                  | 4                   | 3  | 1.0, 6.8   | 0                 | 0   | 0.0, 5.4    |
|                         | Moderate              | 2                   | 1  | 0.3, 5.0   | 0                 | 0   | 0.0, 5.4    |
|                         | Severe                | 0                   | 0  | 0.0, 2.5   | 0                 | 0   | 0.0, 5.4    |
| Headache                | None                  | 93                  | 66 | 57.7, 73.6 | 50                | 76  | 63.8, 85.3  |
|                         | Mild                  | 24                  | 17 | 11.5, 24.0 | 10                | 15  | 7.8, 25.5   |
|                         | Moderate              | 24                  | 17 | 11.5, 24.0 | 6                 | 9   | 4.0, 18.5   |
|                         | Severe                | 0                   | 0  | 0.0, 2.5   | 0                 | 0   | 0.0, 5.4    |

Notes: Denominator for percentages is the number of subjects in the Safety Population (N) with solicited adverse event data available after the first dose of study product.

<sup>a</sup>Each subject's maximum severity is reported for each solicited adverse event across all doses.

<sup>b</sup>Subjects are classified by their worst severity across all AEs

95% CI=95% Blaker Confidence Interval.

**Table S7: Number and Percentage of Subjects Experiencing Unsolicited Adverse Events with 95% Confidence Intervals by MedDRA System Organ Class and Preferred Term, and Treatment Group - Safety Population**

| MedDRA System Organ Class                            | MedDRA Preferred Term              | LACTIN-V<br>(N=151) |    |            |      | Placebo<br>(N=76) |    |            |      |
|------------------------------------------------------|------------------------------------|---------------------|----|------------|------|-------------------|----|------------|------|
|                                                      |                                    | n                   | %  | 95% CI     | Freq | n                 | %  | 95% CI     | Freq |
| Any SOC                                              | Any PT                             | 63                  | 42 | 34.0, 50.0 | 104  | 22                | 29 | 19.4, 40.0 | 31   |
| Cardiac disorders                                    | Any PT                             | 2                   | 1  | 0.2, 4.7   | 3    | 1                 | 1  | 0.1, 6.8   | 1    |
|                                                      | Tachycardia                        | 2                   | 1  | 0.2, 4.7   | 3    | 1                 | 1  | 0.1, 6.8   | 1    |
| Eye disorders                                        | Any PT                             | 1                   | <1 | 0.0, 3.4   | 1    | 0                 | 0  | 0.0, 4.7   | 0    |
|                                                      | Eye inflammation                   | 1                   | <1 | 0.0, 3.4   | 1    | 0                 | 0  | 0.0, 4.7   | 0    |
| Gastrointestinal disorders                           | Any PT                             | 3                   | 2  | 0.5, 5.7   | 4    | 0                 | 0  | 0.0, 4.7   | 0    |
|                                                      | Dyspepsia                          | 1                   | <1 | 0.0, 3.4   | 2    | 0                 | 0  | 0.0, 4.7   | 0    |
|                                                      | Food poisoning                     | 1                   | <1 | 0.0, 3.4   | 1    | 0                 | 0  | 0.0, 4.7   | 0    |
|                                                      | Toothache                          | 1                   | <1 | 0.0, 3.4   | 1    | 0                 | 0  | 0.0, 4.7   | 0    |
| General disorders and administration site conditions | Any PT                             | 4                   | 3  | 0.9, 6.4   | 4    | 3                 | 4  | 1.1, 10.7  | 4    |
|                                                      | Pyrexia                            | 4                   | 3  | 0.9, 6.4   | 4    | 3                 | 4  | 1.1, 10.7  | 4    |
| Infections and infestations                          | Any PT                             | 35                  | 23 | 16.9, 30.7 | 55   | 13                | 17 | 9.8, 27.4  | 16   |
|                                                      | Bronchitis                         | 1                   | <1 | 0.0, 3.4   | 1    | 0                 | 0  | 0.0, 4.7   | 0    |
|                                                      | Chlamydial infection               | 1                   | <1 | 0.0, 3.4   | 1    | 0                 | 0  | 0.0, 4.7   | 0    |
|                                                      | Cystitis                           | 0                   | 0  | 0.0, 2.4   | 0    | 1                 | 1  | 0.1, 6.8   | 1    |
|                                                      | Diarrhoea infectious               | 1                   | <1 | 0.0, 3.4   | 1    | 0                 | 0  | 0.0, 4.7   | 0    |
|                                                      | Ear infection                      | 1                   | <1 | 0.0, 3.4   | 1    | 1                 | 1  | 0.1, 6.8   | 1    |
|                                                      | Genital herpes                     | 1                   | <1 | 0.0, 3.4   | 1    | 0                 | 0  | 0.0, 4.7   | 0    |
|                                                      | Gonorrhoea                         | 1                   | <1 | 0.0, 3.4   | 1    | 0                 | 0  | 0.0, 4.7   | 0    |
|                                                      | Gynaecological chlamydia infection | 1                   | <1 | 0.0, 3.4   | 1    | 0                 | 0  | 0.0, 4.7   | 0    |
|                                                      | Influenza                          | 0                   | 0  | 0.0, 2.4   | 0    | 1                 | 1  | 0.1, 6.8   | 1    |

|                             |                             |   |    |          |   |   |   |          |   |
|-----------------------------|-----------------------------|---|----|----------|---|---|---|----------|---|
| Infections and infestations | Laryngitis                  | 0 | 0  | 0.0, 2.4 | 0 | 1 | 1 | 0.1, 6.8 | 1 |
|                             | Lymphangitis                | 1 | <1 | 0.0, 3.4 | 1 | 0 | 0 | 0.0, 4.7 | 0 |
|                             | Pharyngitis                 | 1 | <1 | 0.0, 3.4 | 1 | 0 | 0 | 0.0, 4.7 | 0 |
|                             | Pharyngitis streptococcal   | 0 | 0  | 0.0, 2.4 | 0 | 1 | 1 | 0.1, 6.8 | 1 |
|                             | Pneumonia                   | 0 | 0  | 0.0, 2.4 | 0 | 1 | 1 | 0.1, 6.8 | 1 |
|                             | Respiratory tract infection | 1 | <1 | 0.0, 3.4 | 1 | 0 | 0 | 0.0, 4.7 | 0 |
|                             | Sinusitis                   | 1 | <1 | 0.0, 3.4 | 1 | 0 | 0 | 0.0, 4.7 | 0 |
|                             | Staphylococcal infection    | 1 | <1 | 0.0, 3.4 | 1 | 0 | 0 | 0.0, 4.7 | 0 |
|                             | Subcutaneous abscess        | 1 | <1 | 0.0, 3.4 | 1 | 0 | 0 | 0.0, 4.7 | 0 |
|                             | Tinea infection             | 1 | <1 | 0.0, 3.4 | 1 | 0 | 0 | 0.0, 4.7 | 0 |
|                             | Tooth infection             | 2 | 1  | 0.2, 4.7 | 2 | 0 | 0 | 0.0, 4.7 | 0 |

|                                                |                                |    |    |           |    |   |   |           |   |
|------------------------------------------------|--------------------------------|----|----|-----------|----|---|---|-----------|---|
|                                                | Trichomoniasis                 | 1  | <1 | 0.0, 3.4  | 1  | 0 | 0 | 0.0, 4.7  | 0 |
|                                                | Urinary tract infection        | 4  | 3  | 0.9, 6.4  | 5  | 2 | 3 | 0.5, 8.8  | 2 |
|                                                | Viral infection                | 2  | 1  | 0.2, 4.7  | 2  | 0 | 0 | 0.0, 4.7  | 0 |
|                                                | Vulvovaginal candidiasis       | 14 | 9  | 5.4, 15.0 | 16 | 3 | 4 | 1.1, 10.7 | 3 |
|                                                | Vulvovaginal mycotic infection | 11 | 7  | 3.8, 12.4 | 15 | 5 | 7 | 2.6, 14.7 | 5 |
| Injury, poisoning and procedural complications | Any PT                         | 3  | 2  | 0.5, 5.7  | 4  | 1 | 1 | 0.1, 6.8  | 1 |
|                                                | Animal bite                    | 1  | <1 | 0.0, 3.4  | 1  | 0 | 0 | 0.0, 4.7  | 0 |
|                                                | Fall                           | 1  | <1 | 0.0, 3.4  | 1  | 0 | 0 | 0.0, 4.7  | 0 |
|                                                | Lower limb fracture            | 1  | <1 | 0.0, 3.4  | 1  | 0 | 0 | 0.0, 4.7  | 0 |
|                                                | Upper limb fracture            | 1  | <1 | 0.0, 3.4  | 1  | 1 | 1 | 0.1, 6.8  | 1 |

**Table S8: Subjects Reporting Unsolicited Adverse Events Occurring in 5% of Subjects in Any Treatment Group by MedDRA System Organ Class and Preferred Term, and Treatment Group - Safety Population**

| MedDRA System Organ Class   | MedDRA Preferred Term          | LACTIN-V<br>(N=151) | Placebo<br>(N=76) |
|-----------------------------|--------------------------------|---------------------|-------------------|
| Infections and infestations | Vulvovaginal candidiasis       | 14 (9.3%)           | 3 (3.9%)          |
|                             | Vulvovaginal mycotic infection | 11 (7.3%)           | 5 (6.6%)          |
| Vascular disorders          | Hypertension                   | 11 (7.3%)           | 4 (5.2%)          |

Notes: Denominator for percentages is the number of subjects in the Safety Population

**Table S9: Listing of Severe Adverse Events, Including Single Serious Adverse Event (SAE)**

| Adverse Event                                                                                                                                                                         | Study Day | Severity | Relationship to Study Treatment | If Not Related, Alternative Etiology               | Action Taken with Study Treatment | Subject Discontinued Due to AE | Outcome                    | MedDRA System Organ Class                      | MedDRA Preferred Term    |
|---------------------------------------------------------------------------------------------------------------------------------------------------------------------------------------|-----------|----------|---------------------------------|----------------------------------------------------|-----------------------------------|--------------------------------|----------------------------|------------------------------------------------|--------------------------|
| <b>Treatment Group: LACTIN-V, Subject ID: STI.00311, AE Number: 001</b>                                                                                                               |           |          |                                 |                                                    |                                   |                                |                            |                                                |                          |
| Spontaneous abortion                                                                                                                                                                  | 87        | Severe   | Not Related                     | Other: Probable spontaneous abortion               | Drug withdrawn                    | N                              | Recovered/Resolved         | Pregnancy, puerperium and perinatal conditions | Abortion spontaneous     |
| Comments: None                                                                                                                                                                        |           |          |                                 |                                                    |                                   |                                |                            |                                                |                          |
| <b>Treatment Group: LACTIN-V, Subject ID: STI.00414, AE Number: 001</b>                                                                                                               |           |          |                                 |                                                    |                                   |                                |                            |                                                |                          |
| Elbow fracture                                                                                                                                                                        | 87        | Severe   | Not Related                     | Other: Accidental injury                           | Dose not changed                  | N                              | Recovered/Resolved         | Injury, poisoning and procedural complications | Upper limb fracture      |
| Comments: None                                                                                                                                                                        |           |          |                                 |                                                    |                                   |                                |                            |                                                |                          |
| <b>Treatment Group: LACTIN-V, Subject ID: STI.00671, AE Number: 001</b>                                                                                                               |           |          |                                 |                                                    |                                   |                                |                            |                                                |                          |
| Spontaneous abortion                                                                                                                                                                  | 37        | Severe   | Not Related                     | Other: Spontaneous abortion/miscarriage (<20weeks) | Drug withdrawn                    | N                              | Recovered/Resolved         | Pregnancy, puerperium and perinatal conditions | Abortion spontaneous     |
| Comments: As per protocol appendix B. Grade 3 for first trimester bleeding: spontaneous abortion.                                                                                     |           |          |                                 |                                                    |                                   |                                |                            |                                                |                          |
| <b>Treatment Group: Placebo, Subject ID: STI.00586, AE Number: 001</b>                                                                                                                |           |          |                                 |                                                    |                                   |                                |                            |                                                |                          |
| Ovarian cyst removal                                                                                                                                                                  | 107       | Severe   | Not Related                     | Other: Ovarian cyst                                | Dose not changed                  | N                              | Recovered/Resolved         | Surgical and medical procedures                | Ovarian cystectomy       |
| Comments: None                                                                                                                                                                        |           |          |                                 |                                                    |                                   |                                |                            |                                                |                          |
| <b>Treatment Group: Placebo, Subject ID: STI.00905, AE Number: 004</b>                                                                                                                |           |          |                                 |                                                    |                                   |                                |                            |                                                |                          |
| Type II diabetes                                                                                                                                                                      | 159       | Severe   | Not Related                     | Other condition/illness: Type II diabetes          | Not applicable                    | N                              | Recovering/Resolving       | Metabolism and nutrition disorders             | Type 2 diabetes mellitus |
| Comments: Diagnosed 1 June 2018 with diabetes and started oral metformin. Under the care of her primary and monitored weekly in clinic and daily at home. Stable on medication.       |           |          |                                 |                                                    |                                   |                                |                            |                                                |                          |
| <b>Treatment Group: Placebo, Subject ID: STI.01089, AE Number: 002</b>                                                                                                                |           |          |                                 |                                                    |                                   |                                |                            |                                                |                          |
| Hypertension                                                                                                                                                                          | 176       | Severe   | Not Related                     | Other condition/illness: Preexisting hypertension  | Not applicable                    | N                              | Not Recovered/Not Resolved | Vascular disorders                             | Hypertension             |
| Comments: Clinician considered the condition stable at participant's last visit. Clinician also directed participant to follow up with her primary care physician the following week. |           |          |                                 |                                                    |                                   |                                |                            |                                                |                          |

| Adverse Event                                                           | Study Day the Event Became Serious | Reason Reported as an SAE                                                             | Severity | Relationship to Study Treatment | If Not Related, Alternative Etiology | Action Taken with Study Treatment | Subject Discontinued Due to AE | Outcome            | MedDRA System Organ Class                      | MedDRA Preferred Term |
|-------------------------------------------------------------------------|------------------------------------|---------------------------------------------------------------------------------------|----------|---------------------------------|--------------------------------------|-----------------------------------|--------------------------------|--------------------|------------------------------------------------|-----------------------|
| <b>Treatment Group: LACTIN-V, Subject ID: STI.01085, AE Number: 001</b> |                                    |                                                                                       |          |                                 |                                      |                                   |                                |                    |                                                |                       |
| Multiple lower limb fractures                                           | 155                                | Persistent or significant disability/incapacity; Requires or prolongs hospitalization | Severe   | Not Related                     | Other condition/illness: Trauma      | Not applicable                    | N                              | Recovered/Resolved | Injury, poisoning and procedural complications | Lower limb fracture   |
| Comments: Serious adverse event (SAE)                                   |                                    |                                                                                       |          |                                 |                                      |                                   |                                |                    |                                                |                       |
